# Supplementary material
Source: PubMed Central journal article supplement (PMC3799338)
Supplement: 1313433110_pnas.201313433SI.pdf [file 1313433110_pnas.201313433SI.pdf]

# Supporting Information

Budelli et al. 10.1073/pnas.1313433110

## SI Materials and Methods

**Constructs.** Various PCR and subcloning strategies such as genomic PCR amplification of the C terminal of Kv1.4, making annealed linker oligos containing the Kv1.4 minimal tail sequence (Slo1C-Kv-minT), addition of restriction sites and mutated nucleotides via PCR oligos, site-directed mutagenesis using Stratagene's Quick Change Mutagenesis Kit, and overlap extension PCR were used to make the constructs in Fig. 1.

**Xenopus Oocytes and ND96 Medium for Incubation and Whole-Cell Recording.** Defolliculated *Xenopus* oocytes were injected with 0.5–150 ng of cRNA using a Nanoject II (Drummond Scientific). Injected oocytes were incubated at 18 °C in ND96 complete medium, consisting of ND96 medium plus 2.5 mM sodium pyruvate and penicillin-streptomycin 1 mL/100 mL. The ND96 medium consisted of (in mM) 96 NaCl, 2 KCl, 1.8 CaCl<sub>2</sub>, 5 MgCl<sub>2</sub>, and Hepes 5 adjusted to pH 7.5. Currents were recorded 2–5 d after injection.

**Electrophysiology and Additional Solutions.** Two-microelectrode voltage-clamp (whole-cell) recordings from *Xenopus* oocytes were obtained in ND96 medium with 1 mM 4,4'-diisothiocyanatostilbene-2,2'-disulphonic acid disodium salt hydrate (DIDS) to block the endogenous chloride conductances. The currents were obtained with an Oocyte Clamp OC-725C amplifier (Warner Instrument Corp.). Recordings were obtained by digitizing at 10 kHz, and low-pass filtering was at 1 kHz. The electrodes were made with borosilicate glass capillaries (World Precision Instruments) pulled with a Sutter Instrument Co. P-87 pipette puller and filled with 3 M KCl.

Patch-clamp recordings were acquired with an Axopatch 200B patch clamp (Molecular Devices), digitized at 100 kHz

(macroscopic currents) or at 200 kHz (single channel), and were low-pass filtered at 2 kHz for macropatch recording and at 10 kHz for single-channel analysis, unless otherwise indicated. The data were analyzed using pClamp 9 (Molecular Devices), SigmaPlot (Jandel Scientific), Origin (Microcal Software), and custom software for the burst analysis (1).

Solutions for macropatch recordings shown in Figs. 2 B and C, 3C, 4C, and 5 and Figs. S2 and S3 A and C contained in the pipette were (in mM) 140 K<sup>+</sup>Methasulfonate, 1 MgCl<sub>2</sub>, and 10 Hepes (for symmetrical K<sup>+</sup>) or 140 NaMethasulfonate, 10 K<sup>+</sup>Methasulfonate, 1 MgCl<sub>2</sub>, and 10 Hepes (for asymmetrical K<sup>+</sup>). Both pipette solutions were adjusted to pH 7.2 using KOH. The bath (intracellular solution) contained (in mM) 140 K<sup>+</sup>Methasulfonate, 10 Hepes, and 1 EGTA, with CaCl<sub>2</sub> and MgCl<sub>2</sub> added as needed to obtain the desired free concentrations, adjusted to pH 7.2 with KOH.

For Figs. 3B and 4 A and B, Fig. S1, and Tables S1 and S2, the 0 Ca<sup>2+</sup> and 0 Mg<sup>2+</sup> bath (intracellular solution) contained (in mM) 150 KCl, 1 EGTA, 1 EDTA, and 5 mM 2-[(2-Hydroxy-1,1-bis(hydroxymethyl)ethyl)amino]ethanesulfonic acid, N-[Tris(hydroxymethyl)methyl]-2-aminoethanesulfonic acid (TES), with the final solution adjusted to pH 7.0 with KOH. The pipette solution for symmetrical K<sup>+</sup> recording contained (in mM) 150 KCl, 2 mM MgCl<sub>2</sub>, and 5 TES (pH 7.0). The pipette solution for asymmetric K<sup>+</sup> recording (Fig. 3B) was the same as the 0 Ca<sup>2+</sup> and 0 Mg<sup>2+</sup> solution, except with 140 mM NaCl and 10 mM KCl. Solutions with symmetrical 150 mM KCl were used unless otherwise indicated. Solutions indicated as 0 Ca<sup>2+</sup> solutions had calculated free Ca<sup>2+</sup> <0.01 μM. To this solution sufficient CaCl<sub>2</sub> or MgCl<sub>2</sub> was added to obtain the calculated free Ca<sup>2+</sup> and Mg<sup>2+</sup> levels indicated in the text. Iberitoxin was from Tocris Bioscience. The other chemicals and reagents were from Sigma-Aldrich.

1. Nimigean CM, Magleby KL (1999) The beta subunit increases the Ca<sup>2+</sup> sensitivity of large conductance Ca<sup>2+</sup>-activated potassium channels by retaining the gating in the bursting states. *J Gen Physiol* 113(3):425–440.

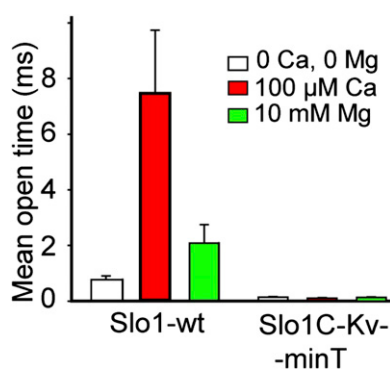

**Fig. S1.** Ca<sup>2+</sup> and Mg<sup>2+</sup> no longer increased the mean open-interval duration (mean open time) after the gating ring in Slo1-WT channels was replaced with an 11-residue tail to obtain Slo1C-Kv-minT channels (see Fig. 1). Data from Table S1 are plotted for Slo1-WT channels and for Slo1C-Kv-minT channels lacking the gating ring. Ca<sup>2+</sup> and Mg<sup>2+</sup> significantly increased mean open time for Slo1-WT channels ( $P < 0.05$ , paired  $t$  test,  $n = 4$ ) but had insignificant effects on mean open time for Slo1C-Kv-minT channels ( $P > 0.09$ ,  $n = 3$ ). Symmetrical 150 mM K<sup>+</sup> was used (see *Materials and Methods*). Error bars represent SEM.





**Table S1. Single-channel kinetic properties for Slo1-WT and Slo1C-Kv-minT channels in the absence and presence of Ca<sup>2+</sup> and Mg<sup>2+</sup>**

| Property                             | Slo1-WT            |                         |                        | Slo1C-Kv-minT      |                         |                        |
|--------------------------------------|--------------------|-------------------------|------------------------|--------------------|-------------------------|------------------------|
|                                      | 0 Ca <sup>2+</sup> | 100 μM Ca <sup>2+</sup> | 10 mM Mg <sup>2+</sup> | 0 Ca <sup>2+</sup> | 100 μM Ca <sup>2+</sup> | 10 mM Mg <sup>2+</sup> |
| nPo                                  | 0.0022 ± 0.0008    | 0.91 ± 0.01             | 0.13 ± 0.06            | 0.0037 ± 0.0008    | 0.0043 ± 0.0011         | 0.0038 ± 0.0005        |
| Po normalized to 0 Ca                | 1.0                | 530 ± 110               | 53 ± 12                | 1.0                | 1.2 ± 0.3               | 1.2 ± 0.4              |
| No. of openings in bursts            | 1.5 ± 0.2          | 28 ± 21                 | 4.8 ± 1.12             | 1.2 ± 0.1          | 1.4 ± 0.1               | 1.5 ± 0.2              |
| Open-interval duration               | 0.77 ± 0.14        | 7.5 ± 2.3               | 2.1 ± 0.66             | 0.14 ± 0.02        | 0.11 ± 0.02             | 0.13 ± 0.02            |
| Intraburst closed-interval duration  | 0.23 ± 0.03        | 0.20 ± 0.07             | 0.16 ± 0.03            | 0.11 ± 0.03        | 0.093 ± 0.021           | 0.14 ± 0.04            |
| Burst duration                       | 1.2 ± 0.2          | *                       | 11 ± 5                 | 0.19 ± 0.01        | 0.17 ± 0.01             | 0.26 ± 0.06            |
| Mean duration of gaps between bursts | 540 ± 100          | *                       | 77 ± 25                | 50 ± 13            | 34 ± 7                  | 47 ± 4                 |

Data were obtained with single-channel recordings from inside-out patches held at +80 mV. Durations are in milliseconds. Slo1-WT data are from four different patches, each containing a single channel with  $n = 1$  in nPo, so that the parameters could be determined readily. Slo1C-Kv-minT data are from three different patches, each containing an unknown number of channels. For Slo1C-Kv-minT channels the mean duration of gaps between bursts for single channels would be greater by a factor of  $n$  for the unknown number of channels. For Slo1C-Kv-minT channels the Po was sufficiently low so that openings seldom overlapped; thus the second through fifth parameters could be determined with negligible error. Effective low-pass filtering of 4.47 kHz was used. Data are presented as mean ± SEM. nPo is number of channels in the patch times their average open probability; Po is the average open probability.

\*With 100 μM Ca<sup>2+</sup> for Slo1-WT channels, the Po was so high that the channel was mostly open, so it was difficult to determine gaps between bursts or burst duration.

**Table S2. Mean open-interval duration and burst duration are decreased for Slo1C-Kv-minT channels**

| Property                            | Slo1-WT     | Slo1C-Kv-minT |
|-------------------------------------|-------------|---------------|
| Open-interval duration              | 0.77 ± 0.14 | 0.14 ± 0.02*  |
| No. of opening in bursts            | 1.5 ± 0.2   | 1.2 ± 0.1     |
| Intraburst closed-interval duration | 0.23 ± 0.03 | 0.11 ± 0.03   |
| Burst duration                      | 1.2 ± 0.2   | 0.19 ± 0.01*  |

Data reformatted from Table S1 to facilitate comparison. Durations are in milliseconds. Data were obtained using single-channel recording with 0 Ca<sup>2+</sup> and 0 Mg<sup>2+</sup>. Slo1-WT data are from four different patches, each containing a single channel. Slo1C-Kv-minT data are from three different patches, each containing an unknown number of channels. The Po was sufficiently low so that openings seldom overlapped; thus the parameters could be determined. \*Open-interval duration and burst duration were significantly decreased ( $P < 0.02$ ) for Slo1C-Kv-minT channels compared with Slo1-WT channels. Effective low-pass filtering of 4.47 kHz was used. Data are presented as means ± SEM.
